# Supplementary material
Source: publisher figshare collection journal article supplement (https://frontiersin.figshare.com/ndownloader/files/29127906)
Supplement: Supplementary file [file 29127906]

**Figure S1**

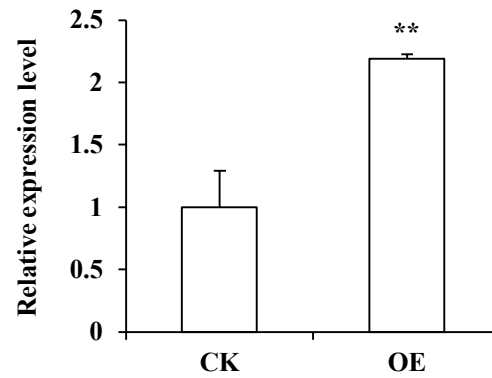

**Figure S1.** Expression levels of *Gm6PGDH1* in hairy root of soybean composite plants. CK represents soybean hairy root transformed with the empty vector; OE means transgenic soybean hairy root with overexpressing *Gm6PGDH1*. Values are the means of three independent samples, and bars indicate SD. Asterisk indicated a significant difference between OE and CK (Student's *t*-test, \*\* $P < 0.01$ ).

**Figure S2**

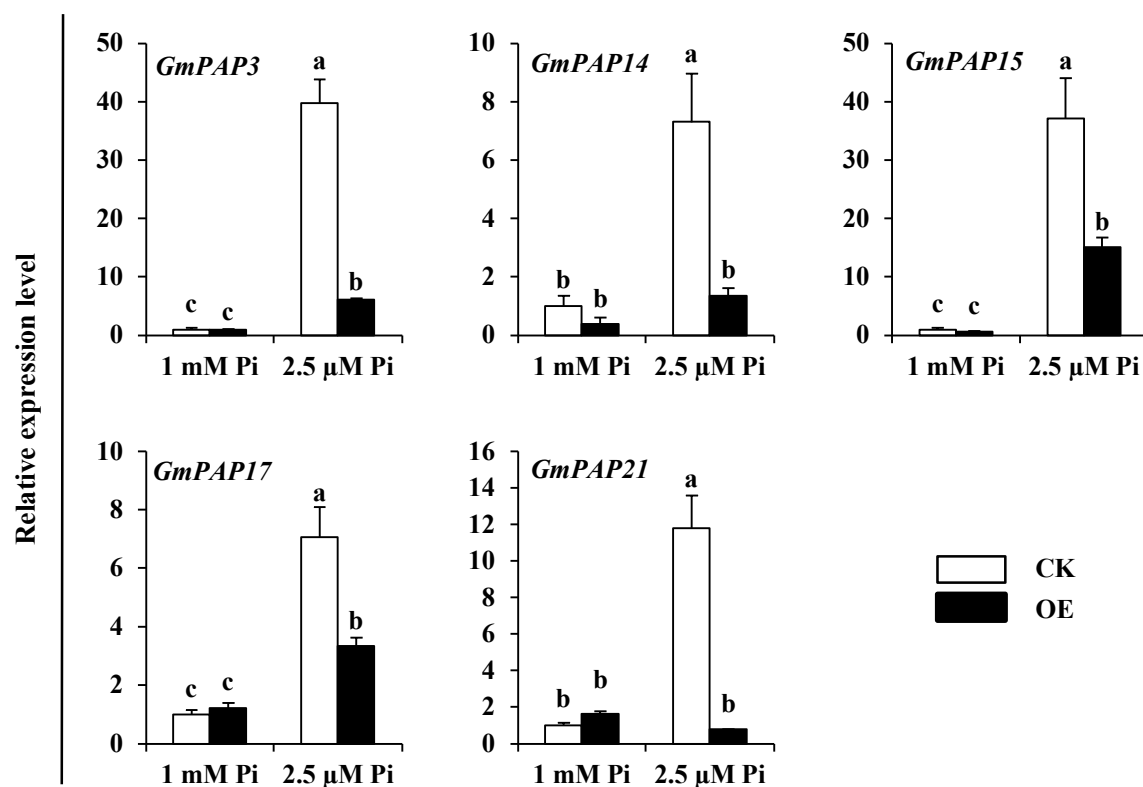

**Figure S2.** Transcript levels of some GmPAPs genes in *Gm6PGDH1*-overexpressing composite soybean plants. Plants were grown in nutrient solutions containing 1 mM or 2.5  $\mu$ M  $\text{KH}_2\text{PO}_4$  for 14 d, and transcripts in hairy roots were determined by RT-qPCR. CK represents soybean hairy roots transformed with the empty vector; OE indicates transgenic soybean hairy roots with overexpressing *Gm6PGDH1*. Values are the means of three independent samples, and bars indicate SD. Means with different letters are significantly different (one-way ANOVA, Duncan,  $P < 0.05$ ).



**Figure S3.**

**(a)**

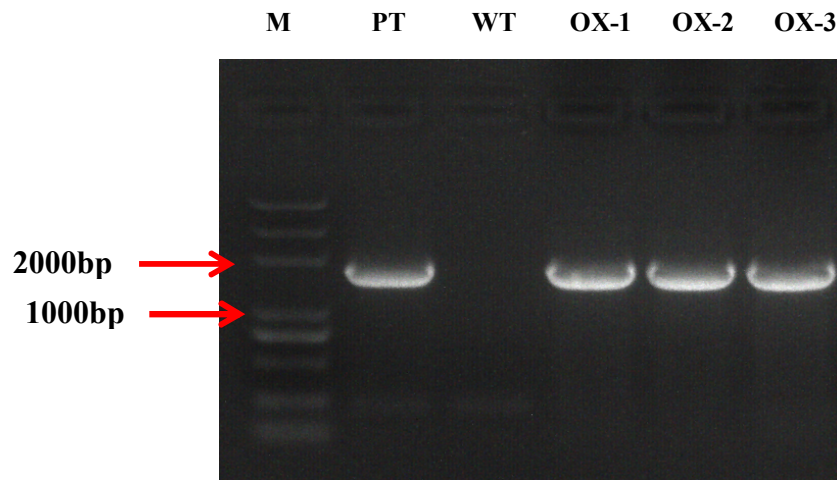

**(b)**

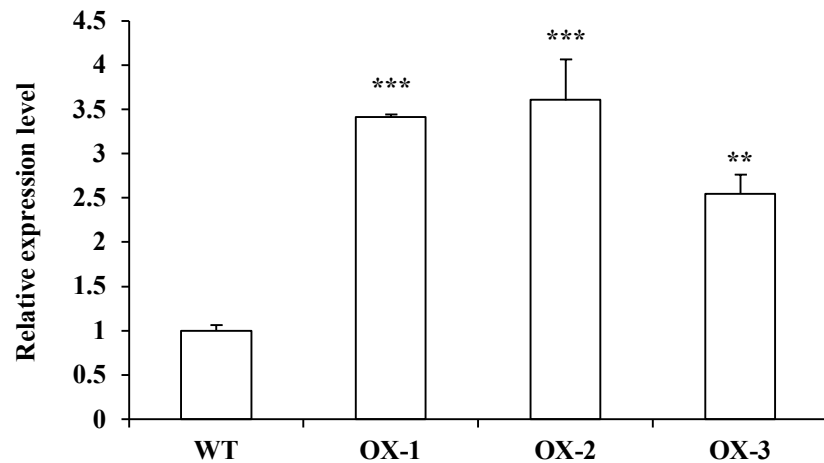

**Figure S3.** The *Gm6PGDH1*-overexpressing transgenic soybeans were identified by PCR (a) and RT-qPCR (b). (a) *Gm6PGDH1* gene has a size of 1461bp fragment. Lanes: M, DNA Marker DL5000; PT, the binary vector pCAMBIA3301-*Gm6PGDH1*; WT, no transformed wild type; OX-1, OX-2 and OX-3, three independent *Gm6PGDH1*-overexpressing transgenic soybean lines. (b) Expression levels of *Gm6PGDH1* in the WT and three transgenic soybean lines. Values are the means of three independent samples, and bars indicate SD. Asterisk indicated a significant difference between WT and each transgenic line (Student's t-test, \*\* $P < 0.01$ , \*\*\* $P < 0.001$ ).

**Figure S4.**

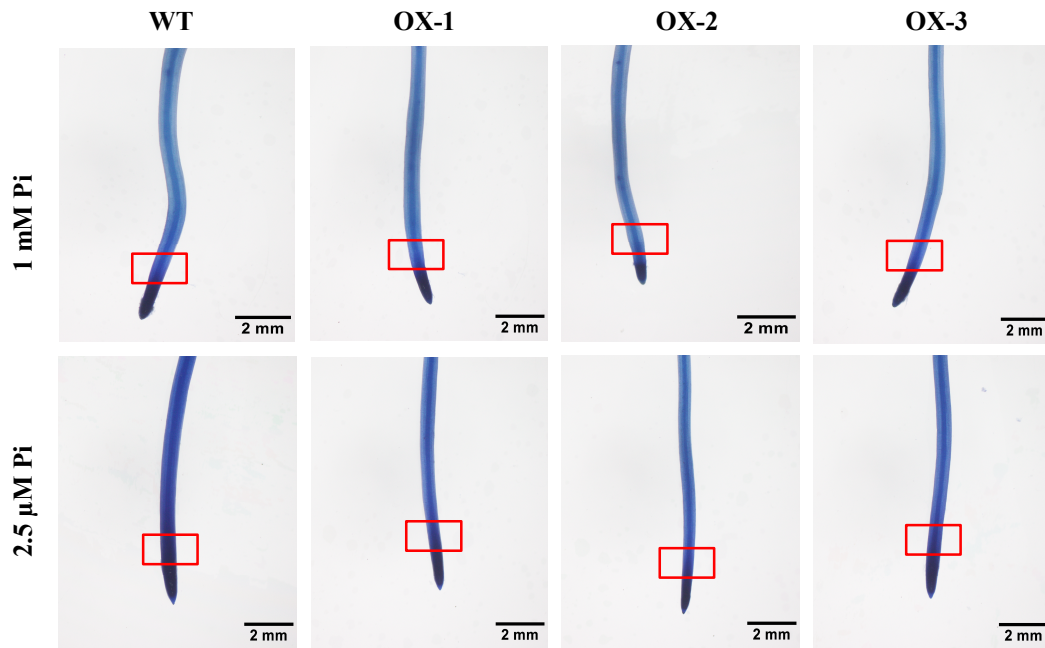

**Figure S4.** The root activity was detected by Trypan Blue staining. T3 progeny of 5 days old *Gm6PGDH1*-overexpressing transgenic soybeans (OX-1 to 3) and wild type (WT) seedlings were exposed to nutrient solution containing a high level of Pi (1 mM Pi, Pi-sufficient) and a low level of Pi (2.5 μM Pi, Pi-deficient) for 10 d (removal of cotyledons), then part of the root tips were taken for staining. The red box indicates the meristematic zone. Bars = 2 mm.

**Figure S5.**

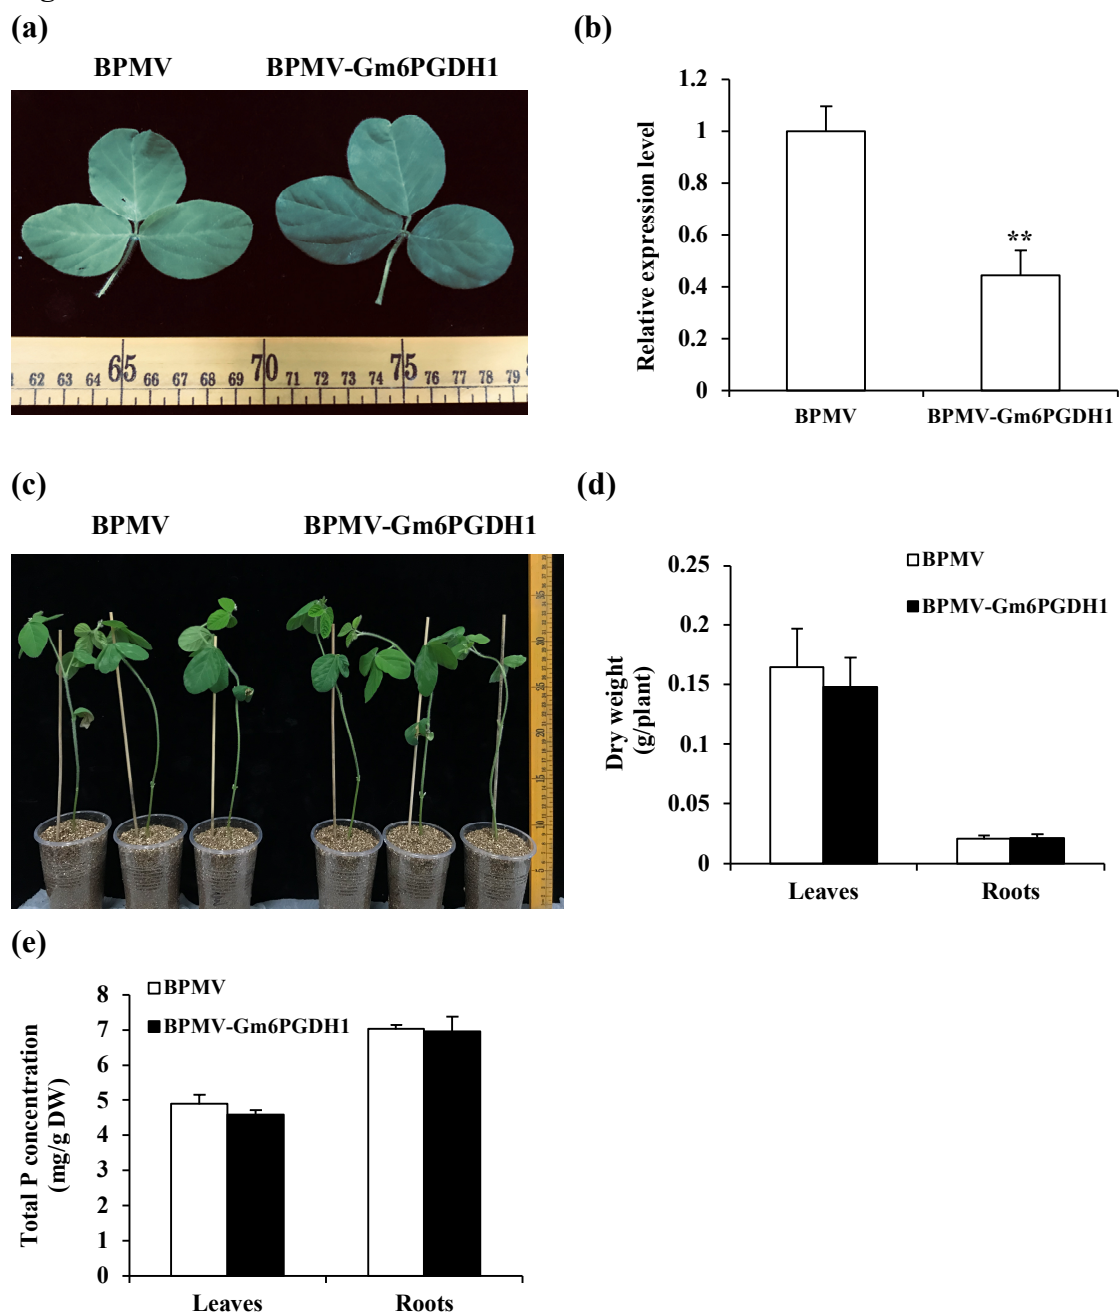

**Figure S5.** Silencing *Gm6PGDH1* had no effect tolerance to Pi starvation in soybean.

(a) The picture of trifoliate leaves inoculated with BPMV (empty vector) and BPMV-*Gm6PGDH1* (silencing vector) were taken two weeks after inoculation. (b) Expression of *Gm6PGDH1* was performed by RT-qPCR using a soybean actin gene as control. (c) The picture of representative plants that were identified were taken seven days after Pi starvation. Dry weight (d) and total P concentration (e) of plants treated as above. The results shown are from three individual plants inoculated with empty vector (BPMV) or silencing vector (BPMV-*Gm6PGDH1*). Data means  $\pm$ SD (n=3). Data significantly different from the corresponding controls are indicated (\*\* $P < 0.01$ , Student's *t*-test). Scale unit in (a) and (c): cm.

**Figure S6.**

**(a)**

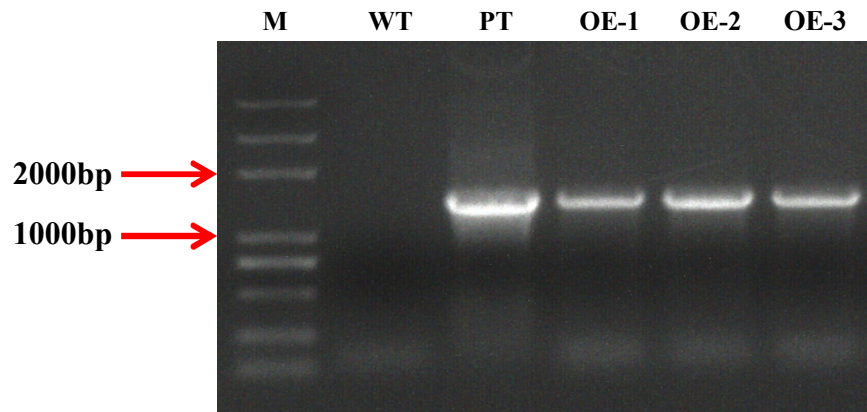

**(b)**

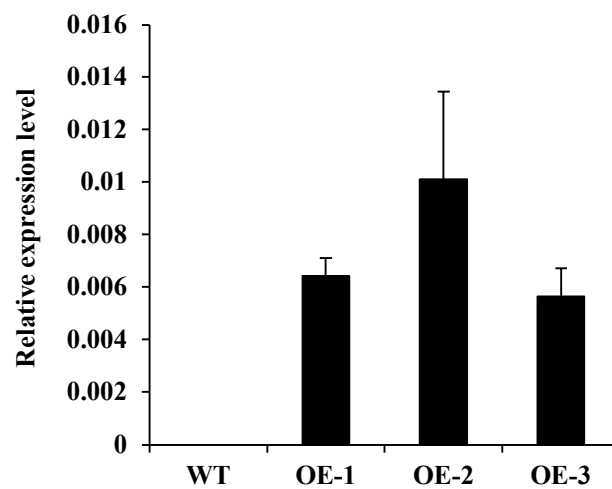

**Figure S6.** The *Gm6PGDH1*-overexpressing transgenic *Arabidopsis* was identified by PCR (a) and RT-qPCR (b). (a) *Gm6PGDH1* gene has a size of 1461bp fragment. Lanes: M, DNA Marker DL 5000; WT, wild type *Arabidopsis*; PT, the binary vector pCAMBIA3301-*Gm6PGDH1*; OE-1, OE-2 and OE-3, three independent *Gm6PGDH1*-overexpressing transgenic *Arabidopsis* lines. (b) Expression levels of *Gm6PGDH1* in the three transgenic *Arabidopsis* lines (OE-1 to 3). Each bar is the meaning of three replicates with SD.

**Table S1.** Primer sequences were used for vector construction and detection.

| Name                     | Forward primer (5'-3')                                 | Reverse primer (5'-3')                                 |
|--------------------------|--------------------------------------------------------|--------------------------------------------------------|
| PET29a- <i>GmG6PDH1</i>  | GCTGATATCGGATCCGA<br>ATTCATGGCTCAACCCT<br>CAACAAGAATAG | GTGGTGGTGGTGGTGCT<br>CGAGAATTCTAGACTGT<br>TTGGCAAGCTTG |
| pJIT166- <i>GmG6PDH1</i> | GGCATGCATGGCTCAAC<br>CCTCAACAAGA                       | CCTCGAGAATTCTAGAC<br>TGTTTGGCAAGCTT                    |
| OE- <i>GmG6PDH1</i>      | AACACGGGGGACTCTT<br>GACAATGGCTCAACCCT<br>CAACAAGAA     | GCCCTTGCTCACCATAG<br>ATCTAATTCTAGACTGTT<br>TGGCAAGC    |
| pCAMBIA3301-GFP          | AACACGGGGGACTCTT<br>GACA                               | GCCCTTGCTCACCATAG<br>ATCT                              |
| VIGS                     | GATCCCACTTCCAAGGT<br>TGATGAGACTGTA                     | TCGAGGCATCAAAGAG<br>GGACCATTACG                        |

**Table S2.** The primer sequences for qRT-PCR analysis in soybean.

| Gene              | Forward primer (5'-3')    | Reverse primer (5'-3')    |
|-------------------|---------------------------|---------------------------|
| <i>GmG6PDH1</i>   | TGGCTCAACCCTCAACAAG<br>A  | CAACCTTGGAAGTGGTTCGG      |
| <i>GmPAP3</i>     | CCAACAAGATGCTGCTAAC<br>GA | CAAAGAGGCCGAGTGAGAT<br>G  |
| <i>GmPAP14</i>    | TCAAGCAGCCCCCTTCATTA<br>G | AGTTTTCTTCGGCAATCTTC      |
| <i>GmPAP15</i>    | TTCGGCAATGCCATCC          | TTCGCAGTTGAAAATGCTCT      |
| <i>GmPAP17</i>    | GGTTTTAAGTGGCAGTTTG<br>G  | GCAACAATGGAGCTTTCTGA      |
| <i>GmPAP21</i>    | GCTGATGGTGTGTTGGATTG      | TGTTGGGTGTCAAAGTTGAG      |
| <i>Gm06g11720</i> | TCTCTGGCACCGATTCACTT      | AGGAGCTCCACTCCTAAACG      |
| <i>Gm08g05680</i> | TCAGAGAGGAGCTCAGGA<br>CT  | CGGCGACCTTAAGCATTTC       |
| <i>Gm03g36620</i> | CACTGCAGAGAAGGACTCC<br>A  | TCCCTAGCTGCCAATGCTAA      |
| <i>Gm09g02590</i> | ATTTGGACCTGAGCACACC<br>T  | GTATCAGCACCAAGGAGTGGA     |
| <i>Gm09g02650</i> | CACTGGGAAGAAGGGATG<br>GT  | TGAGCACCTGAAAGTGCAAC      |
| <i>Gm15g13491</i> | CTGCCTTTGCTGTTCAAGG<br>T  | AGAGTTGGACCAGGGTTTCC      |
| <i>Actin</i>      | CCTCAACCCAAAGGTCAAC<br>AG | GACCAGCGAGATCCAAACG<br>AA |

**Table S3.** The primer sequences for qRT-PCR analysis in *Arabidopsis*.

| Gene            | Forward primer (5'-3')       | Reverse primer (5'-3')      |
|-----------------|------------------------------|-----------------------------|
| <i>GmG6PDH1</i> | TGGCTCAACCCTCAACAAG<br>A     | CAACCTTGGAAGTGGTTCGG        |
| <i>Actin2-8</i> | ACGGTAACATTGTGCTCAGT<br>GGTG | CTTGGAGATCCACATCTGCT<br>GGA |
